# Supplementary material for: The Prevalence of Tick-Borne Encephalitis Virus in Wild Rodents Captured in Tick-Borne Encephalitis Foci in Highly Endemic Lithuania
Source: MDPI journal article supplement (doi:10.3390/v16030444), 2024-03-13
Supplement: s1 [file s1]

## Supplementary material:

### Simkute E. et al. The Prevalence of Tick-Borne Encephalitis Virus in Wild Rodents Captured in Tick-Borne Encephalitis Foci in Highly Endemic Lithuania

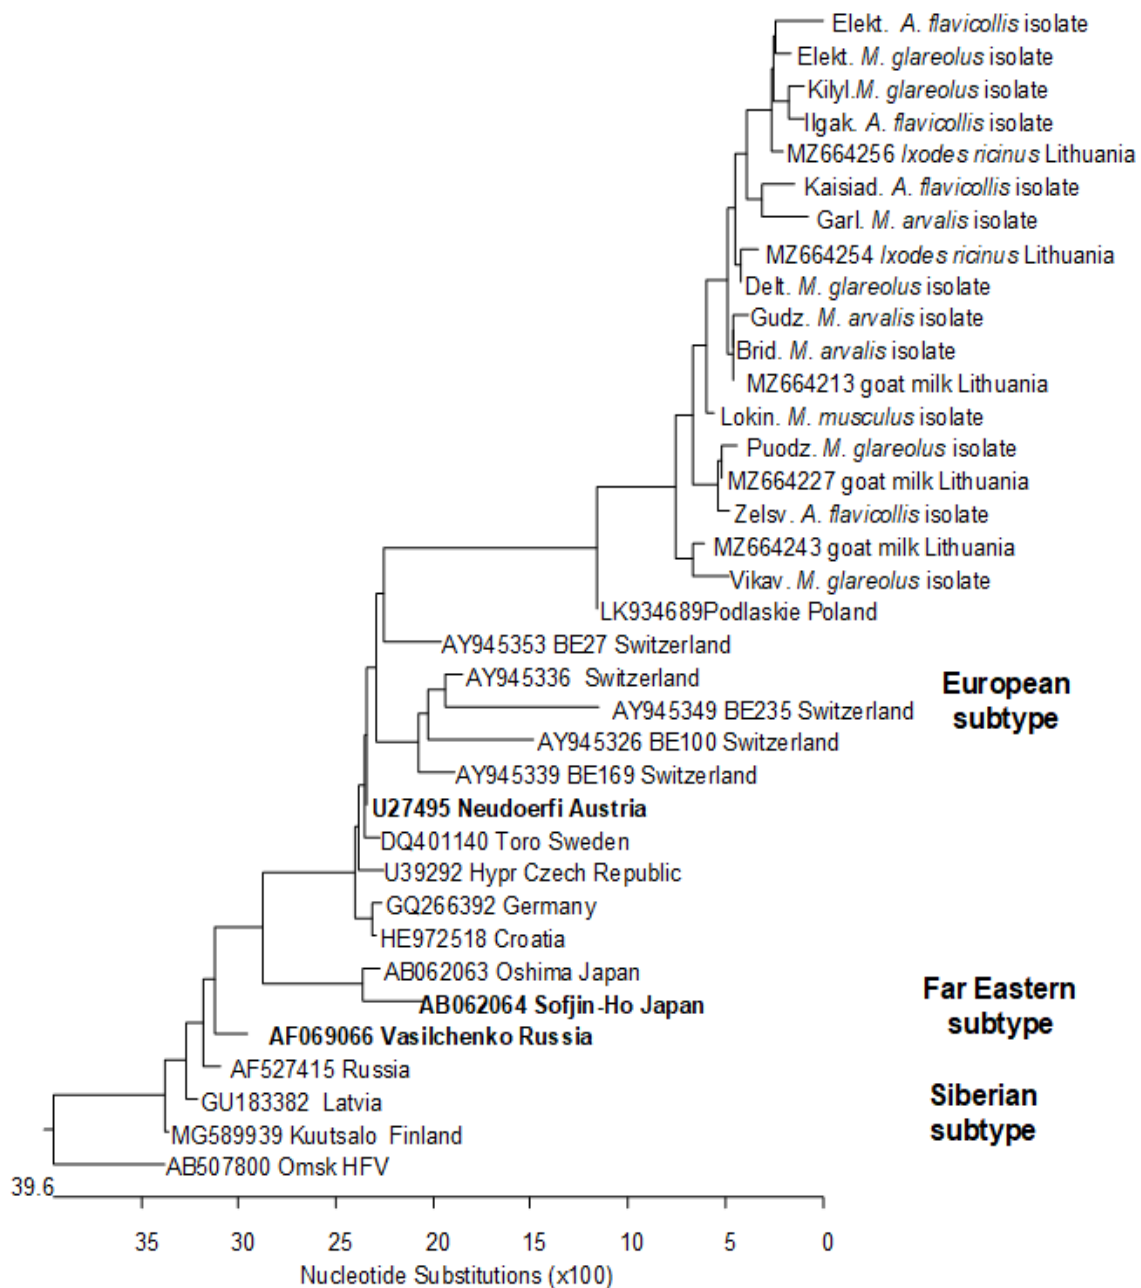

**Figure. S1.** Phylogenetic tree of the obtained TBEV isolate sequences based on NCR genome fragment. The Omsk hemorrhagic fever virus was used as an outgroup. Sequences of different TBEV strains and closely related flaviviruses chosen from the NCBI GenBank database were used for phylogenetic comparisons. Multiple alignment of all sequences was created using ClustalW software (Clustal, Dublin, Ireland) in MEGA X package. The neighbor-joining method was used for phylogenetic tree construction with 100 bootstrapping replicates.

**Table S1.** Results of TBEV RNA prevalence rate in rodent brain and internal organ mix sample isolates which were PCR-negative in suspensions ( $n = 30$ ), grouped according to the month of rodent trapping.

| Date of rodent trapping | Number of trapped rodents (total/TBEV RNA-positive in suspensions/TBEV RNA-positive in isolates) | TBEV RNA prevalence rate (%) in suspension samples | TBEV RNA prevalence rate (%) in rodent sample isolates which were PCR-negative in suspensions | Average monthly air temperature (°C) | Rodent trapping sites and TBEV RNA prevalence rate (%) in suspension samples |
|-------------------------|--------------------------------------------------------------------------------------------------|----------------------------------------------------|-----------------------------------------------------------------------------------------------|--------------------------------------|------------------------------------------------------------------------------|
| March 2019              | 34/28/33                                                                                         | 82.4                                               | 15.2 (CI 95 % 5.1 – 31.9) <sup>1</sup>                                                        | 3 (1 – 3.7)                          | Elektrenai (84.6); Garliava (72.7); Grabuciskes (100); Ilgakiemis (90)       |
| April 2019              | 8/5/8                                                                                            | 62.5                                               | 37.5 (CI 95 % 8.5 – 75.5) <sup>2</sup>                                                        | 8.6 (5 – 15.1)                       | Bridai (25); Narepai (100)                                                   |
| October 2019            | 24/15/22                                                                                         | 62.5                                               | 31.8 (CI 95 % 13.9 – 54.9)                                                                    | 9.3 (6 – 13.2)                       | Kaisiadorys (42.9); Naujasodis (60); Pakalniskes (50); Zelsva (87.5)         |
| November 2019           | 23/15/21                                                                                         | 65.2                                               | 28.6 (CI 95 % 11.3 – 52.2)                                                                    | 4.9 (- 1.2 – 8.3)                    | Kazlu Ruda (62.5); Krokialaukis (66.7)                                       |
| January 2020            | 31/28/31                                                                                         | 90.3                                               | 9.7 (CI 95 % 2.0 – 25.8) <sup>2</sup>                                                         | 2.8 (0.6 – 5.1)                      | Gudziunai (100); Kivyliai (100); Puodziai (70); Elektrenai (100)             |
| March 2020              | 9/9/9                                                                                            | 100                                                | 0 (CI 95% 0 – 33.6)*                                                                          | 3.3 (0.5 – 5.5)                      | Deltuva (100); Lokine (100)                                                  |
| May 2020                | 10/4/10                                                                                          | 40                                                 | 60 (CI 95 % 26.2 – 87.8)                                                                      | 10.2 (7.2 – 13.1)                    | Lekeciai (25); Vilkaviskis (50)                                              |

**Note:** <sup>1</sup> Including rodent which was PCR-positive only in fetal sample suspension. <sup>2</sup> Including rodent which brain sample was not taken. \*One-sided 97.5% confidence interval.

**Table S2.** Results of TBEV RNA prevalence rate in brain and internal organ mix suspension and isolate samples of different rodent species.

| Name of the rodent trapping location | Latitude coordinate | Longitude coordinate | Date of rodent trapping | Number and species of trapped rodents (total/TBEV RNA positive in suspensions/TBEV RNA positive in isolates) | TBEV RNA prevalence rate in suspension samples (%) | TBEV RNA prevalence rate in isolate samples (%) |
|--------------------------------------|---------------------|----------------------|-------------------------|--------------------------------------------------------------------------------------------------------------|----------------------------------------------------|-------------------------------------------------|
| Gudziunai                            | 56.0888             | 23.2805              | Jan 2020                | <i>A. flavicollis</i> 2/2/2<br><i>C. glareolus</i> 1/1/1<br><i>M. arvalis</i> 9/9/9                          | 100                                                | 100                                             |
| Bridai                               | 56.0226             | 23.3263              | Apr 2019                | <i>A. flavicollis</i> 2/0/2                                                                                  | 25                                                 | 100                                             |

|                               |         |         |          |                               |      |      |
|-------------------------------|---------|---------|----------|-------------------------------|------|------|
|                               |         |         |          | <i>M. arvalis</i> 2/1/2       |      |      |
| <b>Deltuva</b>                | 55.2857 | 24.6144 | Mar 2020 | <i>C. glareolus</i> 1/1/1     | 100  | 100  |
|                               |         |         |          | <i>M. musculus</i> 1/1/1      |      |      |
| <b>Elektrenai<sup>1</sup></b> | 54.7763 | 24.6290 | Mar 2019 | <i>A. flavicollis</i> 8/6/8   | 84.6 | 100  |
|                               |         |         |          | <i>C. glareolus</i> 1/1/1     |      |      |
|                               |         |         |          | <i>M. arvalis</i> 1/1/1       |      |      |
|                               |         |         | Jan 2020 | <i>A. flavicollis</i> 2/2/2   | 100  | 100  |
|                               |         |         |          | <i>C. glareolus</i> 1/1/1     |      |      |
| <b>Garliava</b>               | 54.8011 | 23.8756 | Mar 2019 | <i>A. flavicollis</i> 8/7/8*  | 72.7 | 100  |
|                               |         |         |          | <i>C. glareolus</i> 2/1/2     |      |      |
|                               |         |         |          | <i>M. arvalis</i> 1/1/1       |      |      |
| <b>Grabuciskes</b>            | 54.8947 | 24.1574 | Mar 2019 | <i>M. arvalis</i> 2/2/2       | 100  | 100  |
| <b>Ilgakiemis</b>             | 54.7860 | 23.8677 | Mar 2019 | <i>A. flavicollis</i> 4/3/3   | 90   | 90   |
|                               |         |         |          | <i>C. glareolus</i> 2/2/2     |      |      |
|                               |         |         |          | <i>M. arvalis</i> 3/3/3       |      |      |
|                               |         |         |          | <i>M. musculus</i> 1/1/1      |      |      |
| <b>Kaisiadorys</b>            | 54.8511 | 24.4561 | Oct 2019 | <i>A. flavicollis</i> 5/2/3   | 42.9 | 71.4 |
|                               |         |         |          | <i>M. musculus</i> 1/0/1      |      |      |
|                               |         |         |          | <i>A. agrarius</i> 1/1/1      |      |      |
| <b>Kazlu Ruda</b>             | 54.7371 | 23.4609 | Nov 2019 | <i>A. flavicollis</i> 5/4/5   | 62.5 | 100  |
|                               |         |         |          | <i>C. glareolus</i> 3/1/3     |      |      |
| <b>Kivyčiai</b>               | 56.3566 | 22.7115 | Jan 2020 | <i>C. glareolus</i> 5/5/5     | 100  | 100  |
|                               |         |         |          | <i>M. arvalis</i> 1/1/1       |      |      |
| <b>Krokialaukis</b>           | 54.4277 | 23.4847 | Nov 2019 | <i>A. flavicollis</i> 12/7/10 | 66.7 | 86.7 |
|                               |         |         |          | <i>C. glareolus</i> 1/1/1     |      |      |
|                               |         |         |          | <i>A. sylvaticus</i> 2/2/2    |      |      |
| <b>Lekčiai</b>                | 54.5213 | 23.0375 | May 2020 | <i>A. flavicollis</i> 2/0/2   | 25   | 100  |
|                               |         |         |          | <i>M. musculus</i> 2/1/2      |      |      |
| <b>Lokine</b>                 | 54.3275 | 24.4900 | Mar 2020 | <i>A. flavicollis</i> 4/4/4   | 100  | 100  |
|                               |         |         |          | <i>M. musculus</i> 3/3/3      |      |      |
| <b>Narepai</b>                | 54.9491 | 24.0171 | Apr 2019 | <i>A. flavicollis</i> 1/1/1   | 100  | 100  |
|                               |         |         |          | <i>C. glareolus</i> 3/3/3*    |      |      |
| <b>Naujasodis</b>             | 54.9517 | 23.9873 | Oct 2019 | <i>A. flavicollis</i> 5/3/5   | 60   | 100  |
| <b>Pakalniskes</b>            | 54.7371 | 24.6999 | Oct 2019 | <i>A. flavicollis</i> 2/0/2   | 50   | 100  |
|                               |         |         |          | <i>C. glareolus</i> 1/1/1     |      |      |
|                               |         |         |          | <i>M. arvalis</i> 1/1/1       |      |      |

|                    |         |         |          |                                                                                                                    |      |     |
|--------------------|---------|---------|----------|--------------------------------------------------------------------------------------------------------------------|------|-----|
| <b>Puodziai</b>    | 54.3580 | 24.6600 | Jan 2020 | <i>A. flavicollis</i> 4/4/4<br><i>C. glareolus</i> 6/3/6                                                           | 70   | 100 |
| <b>Vilkaviskis</b> | 54.6294 | 23.1872 | May 2020 | <i>A. flavicollis</i> 1/0/1*<br><i>C. glareolus</i> 2/0/2*<br><i>M. arvalis</i> 2/2/2*<br><i>M. musculus</i> 1/1/1 | 50   | 100 |
| <b>Zelsva</b>      | 54.4070 | 23.4578 | Oct 2019 | <i>A. flavicollis</i> 8/7/8                                                                                        | 87.5 | 100 |

**Note:** <sup>1</sup> Rodent samples were collected at different months in the same location. \* A fetal sample was taken from rodents.
